# Supplementary material for: The influence of intercalating perfluorohexane into lipid shells on nano and microbubble stability
Source: Royal Society of Chemistry journal article supplement (doi:10.1039/c6sm00956e), 2016-01-01
Supplement: c6sm00956e1.pdf [file c6sm00956e1.pdf]

## Improving *in vivo* microbubbles lifetime via intercalation of C<sub>6</sub>F<sub>14</sub> into the lipid shell

### Supplementary 1:

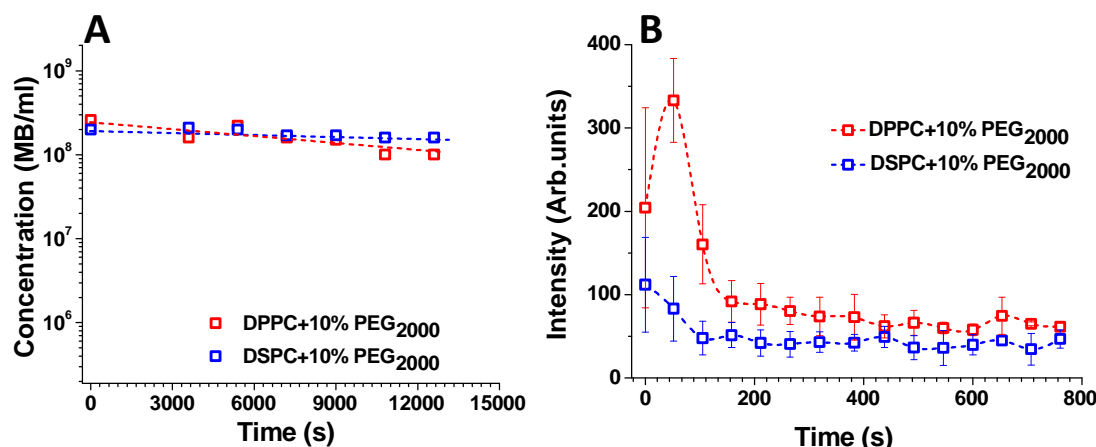

**Supp 1:** Graphical representation comparing lifetime of MBs. **(A):** *in vitro* MB lifetime for C<sub>3</sub>F<sub>8</sub> gas encapsulated MB with different lipids DPPC and DSPC, in the shell at room temperature. **(B):** *in vivo* Time Intensity Curves (TICs) for the same composition MBs, in mice aorta

*In vitro*, (supp 1A) samples were collected and imaged every 30 min to measure the MB concentration. The presented results show long lived MBs in both cases (>3 hrs) and no significant difference for either of the lipid coated MB samples. *In vivo*, supp 1B. The same samples were injected into mice via the tail and time intensity curves (TICs) obtained in the mouse aorta. Supp1B shows the TIC curves with very short *in vivo* stability (~2min) but detectable difference in signal intensity between the two samples.

These results suggested that the *in vitro* experiment do not simulate the *in vivo* conditions adequately. The *in vivo* TIC curves suggested DPPC based MBs provide stronger contrast than the DSPC based MBs.

Supplementary 2:

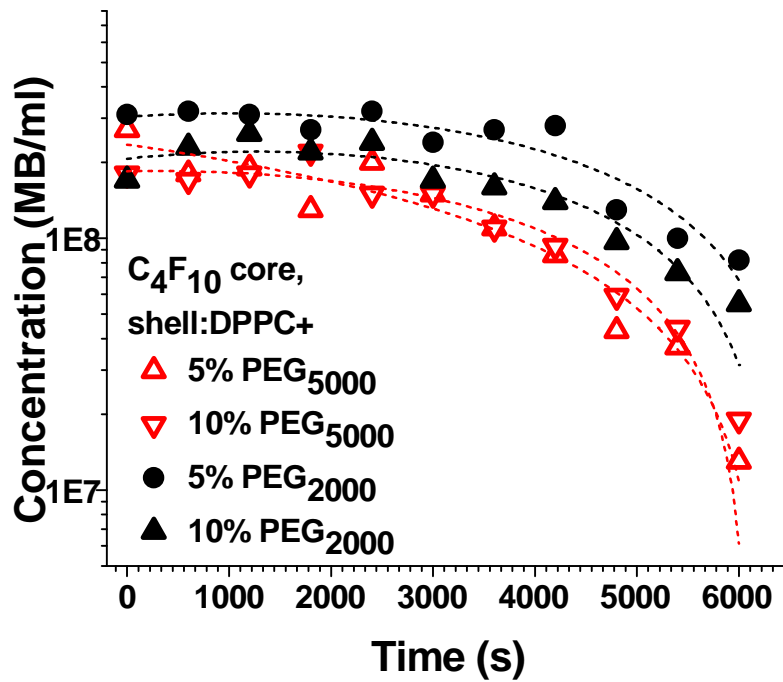

**Supp 2:** Concentration of MBs with DPPC as the main lipid component and different PEG chain lengths and concentrations. In this case the gas core is fixed to C<sub>4</sub>F<sub>10</sub>.

**Supp.2** Effect of changing the PEG concentration and PEG chain length on MB stability. MBs in this case are all encapsulating C<sub>4</sub>F<sub>10</sub> in the core and have DPPC as the major shell component, with either 5 or 10% of either DSPE-PEG<sub>2000</sub> or DSPE-PEG<sub>5000</sub>. The results here show that the longest lived MBs are those with 5% PEG<sub>2000</sub> in the shell.

### Supplementary 3:

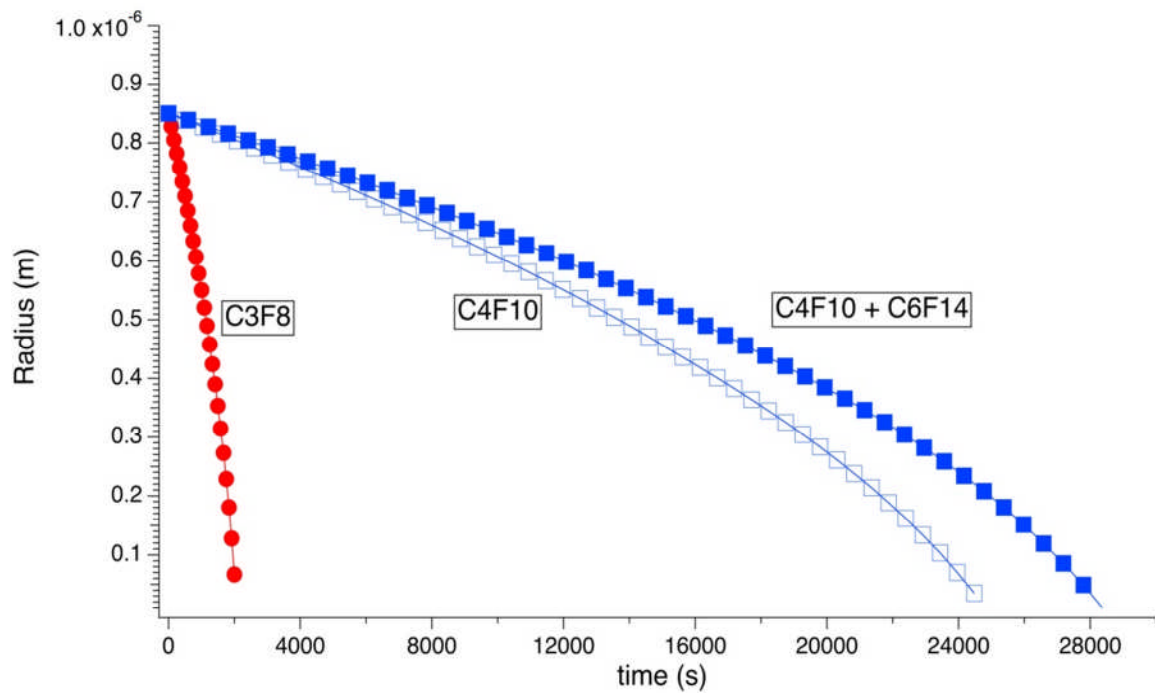

**Supp 3:** Modelling MB lifetime after Epstein-Plesset (ref K. Sarkar)

Supp.3 shows modelling of MB size as a factor of changing the gas core, this modelling is calculated Following Sarkar and using these constants for the calculations:

$L_g$  = Ostwald Coeff.:  $C_3F_8 = 5.2e-4$ ;  $C_4F_{10} = 2.02e-4$ ;

$K_g$  = diffusivity of gas in water ( $m^2s^{-1}$ ):  $C_3F_8 = 7.45e-10$ ;  $C_4F_{10} = 6.9e-10$

$h_g = 1/R_{shell}$  = permeability of shell ( $ms^{-1}$ ):  $C_3F_8 = 1.2e-6$ ;  $C_4F_{10} = 2.57e-7$

Supplementary 4:

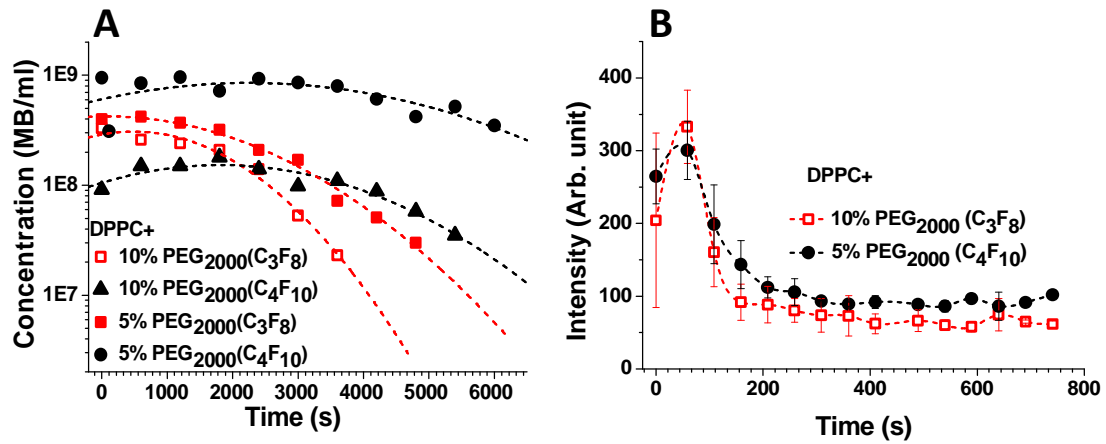

Supp 4: MBs lifetime with changing gas component and PEG<sub>2000</sub> concentration in the shell . (A): *in vitro* MB lifetime in cell media at 37 °C. (B): *in vivo* Time Intensity Curves (TICs) comparing the difference between the shortest and improved lifetime MBs in mice aorta.
